# Supplementary material for: Endothelial lipid droplets suppress eNOS to link high fat consumption to blood pressure elevation
Source: JCI journal article supplement (doi:10.1172/jci173160), 2023-10-12
Supplement: sd1 [file 1]

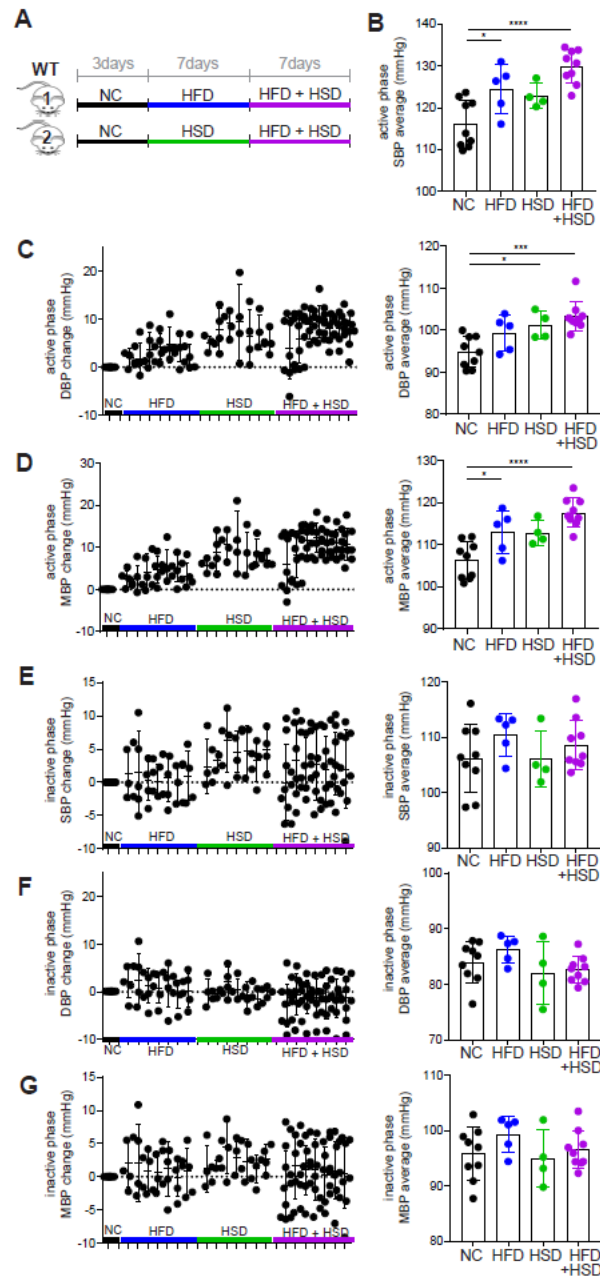

### Supplementary Figure1. High fat diet induces blood pressure elevation during active phase.

**A.** Experimental setup for administration of normal chow (NC), high fat diet (HFD), high salt diet (HSD), or both HFD+HSD in wild type C57BL/6J mice, while monitoring blood pressure by non-invasive telemetry. **B.** Average active phase SBP while provided with the indicated diet. \*\*\*\*  $p < 0.0001$ , \*  $< 0.05$  by 1-way ANOVA. **C.** Left panel: Elevation of diastolic blood pressure (DBP) during active phase. Right panel: Average active phase DBP. \*\*\*  $p < 0.001$ , \*  $< 0.05$  by 1-way ANOVA. **D.** Left panel: Elevation of mean blood pressure (MBP) during active phase. Right panel: Average active phase MBP. \*\*\*\*  $p < 0.0001$ , \*  $< 0.05$  by 1-way ANOVA. **E.** Left panel: Elevation of SBP during inactive phase. Right panel: Average inactive phase SBP. **F.** Left panel: Elevation of DBP during inactive phase. Right panel: Average inactive phase DBP. **G.** Left panel: Elevation of MBP during inactive phase. Right panel: Average inactive phase MBP.

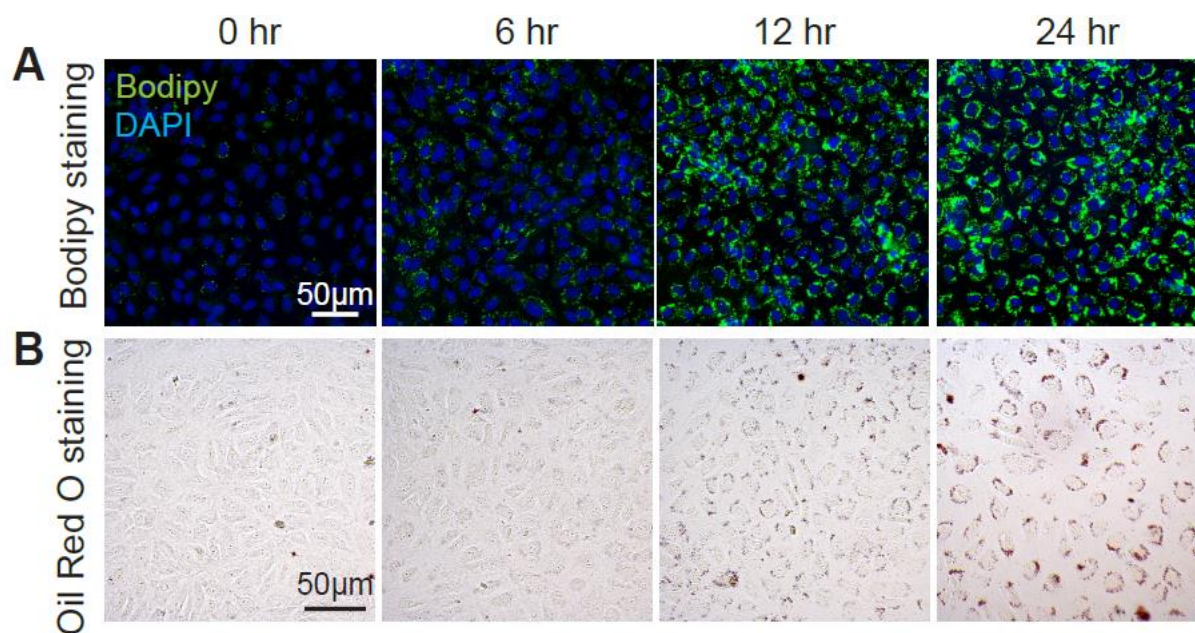

**Supplementary Figure2. Fatty acids induce endothelial lipid droplet accumulation in vitro. A-B.** Time course incubation of 500  $\mu$ M oleic acid (OA) in HUVECs. Lipid droplets were visualized with bodipy (A) or Oil Red O (B) staining.

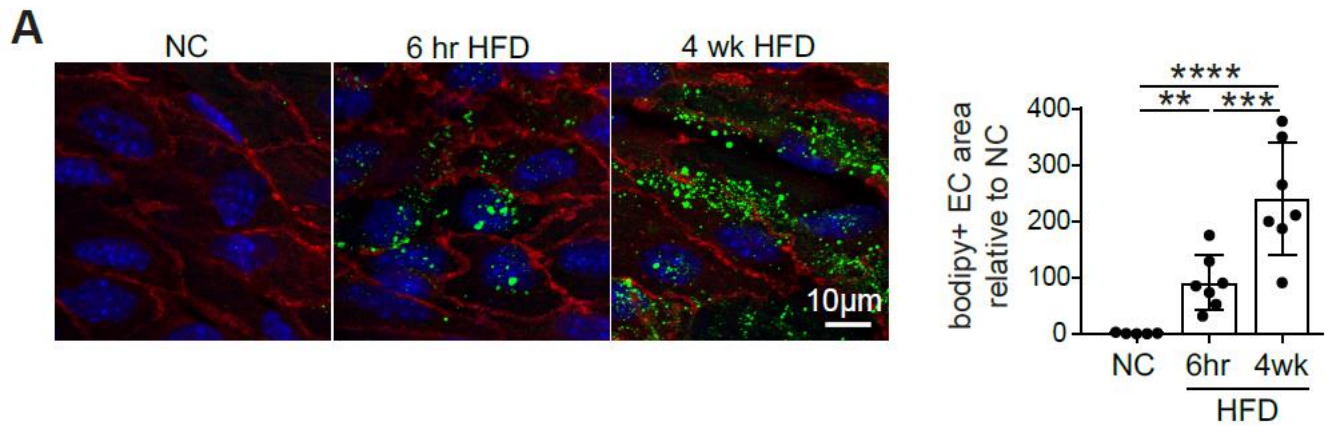

**Supplementary Figure3. Long-term high fat diet (HFD) induces greater lipid droplet accumulation in the endothelium in vivo.** Left panel: *en face* staining of thoracic aorta upon normal chow (NC), 6-hour HFD, or 4-week HFD using bodipy (green), CD31 (red), and DAPI (blue). Right panel: bodipy-stained area in the endothelium is quantified. \*\*\*\*  $p < 0.0001$ , \*\*\*  $p < 0.001$ , \*\*  $p < 0.01$  by 1-way ANOVA.

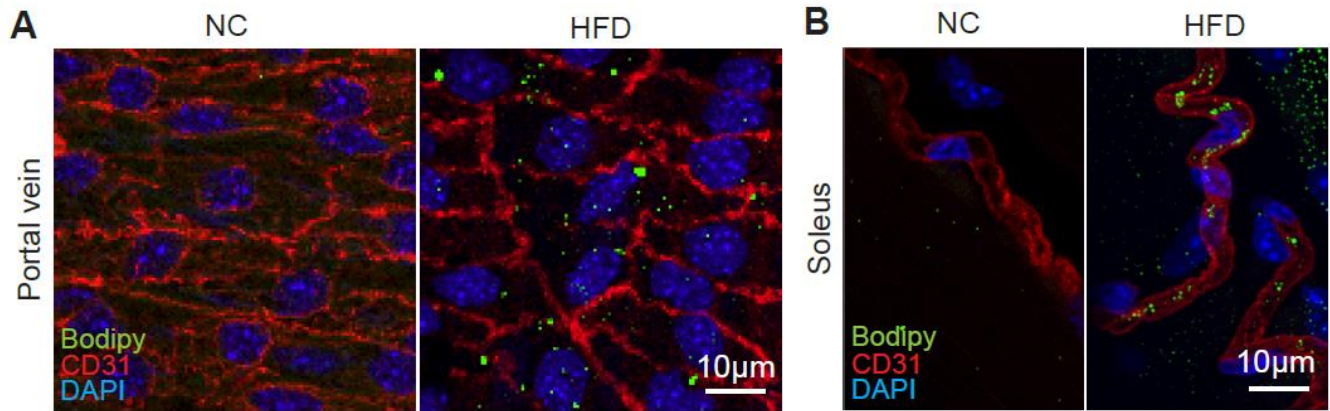

**Supplementary Figure4. High fat diet induces endothelial lipid droplet accumulation in vivo.** **A.** *en face* staining of portal vein using bodipy (green), CD31 (red), and DAPI (blue), after 5 hours of either NC or HFD *ad lib* feeding. **B.** Whole-mount staining of capillary vessel in the soleus using bodipy (green), CD31 (red), and DAPI (blue), after 5 hours of either NC or HFD *ad lib* feeding.

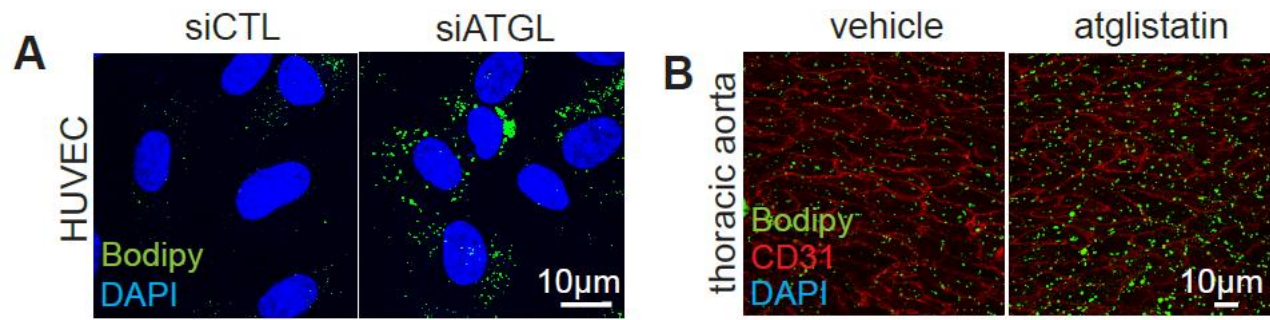

**Supplementary Figure5. Suppression of ATGL leads to the accumulation of lipid droplet in endothelial cells.**

**A.** Immuno-staining of HUVECs treated with control or *Atgl* siRNA for 2 days. Bodipy (green) and DAPI (blue). **B.** *en face* staining of the thoracic aorta after 24 hours of *ex vivo* culture in the presence of vehicle or atglistatin (ATGL inhibitor). Bodipy (green), CD31 (red), and DAPI (blue).



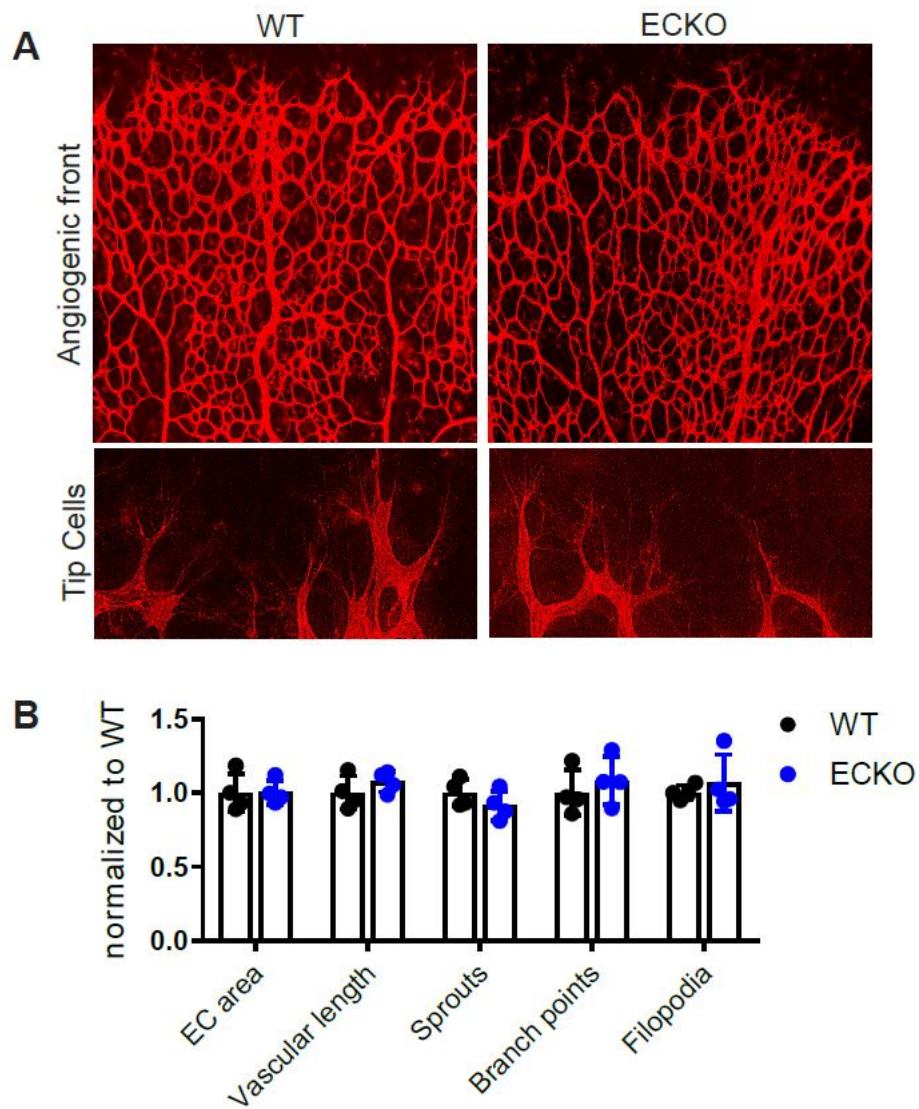

**Supplementary Figure 6. *Atgl* ECKO mice exhibit normal retinal vascular development.** **A.** Whole-mount staining of retina vasculature at postnatal day 5 with IsoB4 (red). Representative images from angiogenic front (upper panel) and tip cells (lower panel) are shown. **B.** Quantification of the endothelial cell area, vascular length, number of sprouts, number of branch points, and number of filopodia are indicated.

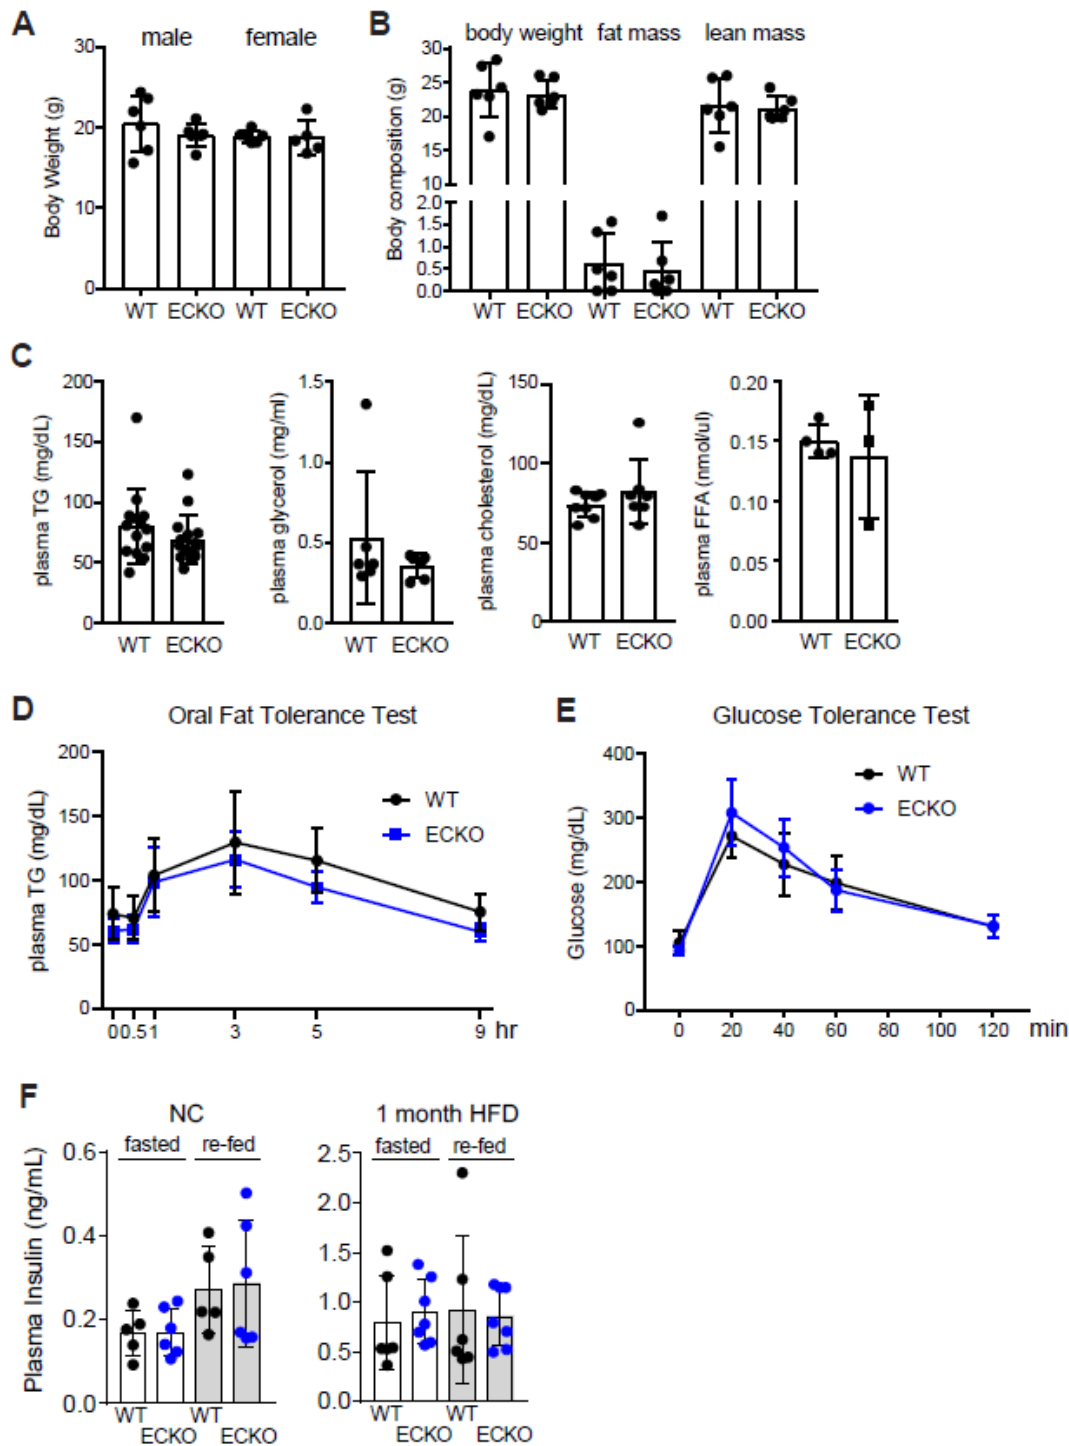

**Supplementary Figure 7. *Atgl* ECKO mice appear grossly and metabolically normal.** **A.** Body weight of the mice at 12-wk-old age. **B.** Body composition measured by EchoMRI at 20-wk-old of male mice. **C.** Plasma lipid profiles including triglyceride (TG), glycerol, cholesterol, and FFA after 5 hours of fasting. **D.** Oral fat tolerance test in 20-wk-old male mice. Plasma TG was measured from tail blood at the indicated time points after administration by oral gavage of olive oil (10 ml/kg). **E.** Glucose tolerance test in 20-wk-old male mice. Glucose from tail blood was measured at the indicated time points after IP injection of glucose (2 g/kg). **F.** Plasma insulin levels measured in 20-week-old male mice under fasted and re-fed conditions after being maintained on either a normal chow (NC) or high-fat diet (HFD) for one month.

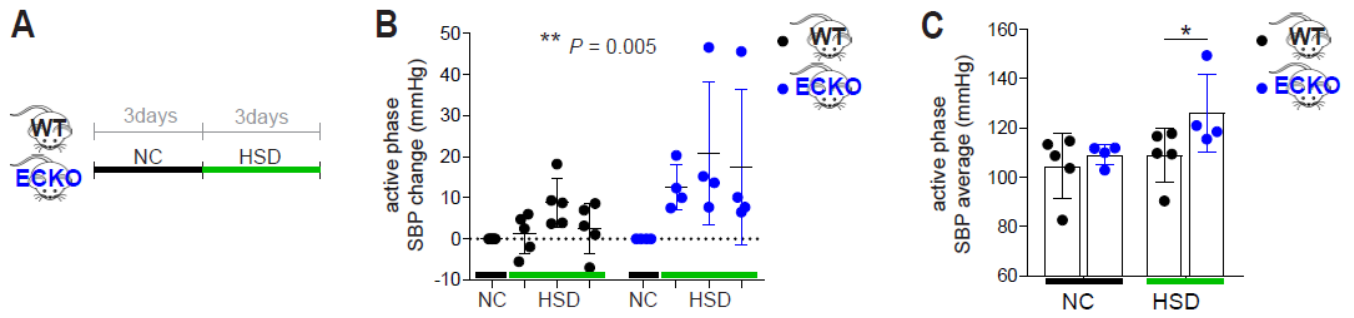

**Supplementary Figure 8. *Atgl* ECKO mice are susceptible to salt-induced blood pressure elevation. A.** Experimental setup for the administration of NC or high salt diet (HSD) in WT vs *Atgl* ECKO mice. **B.** Elevation of SBP during active phase while provided with the indicated diet for 3 days. N=5 each genotype. \*\*  $p < 0.01$  by 2-way ANOVA. **C.** Average active phase SBP. \*  $p < 0.05$  by 1-way ANOVA.



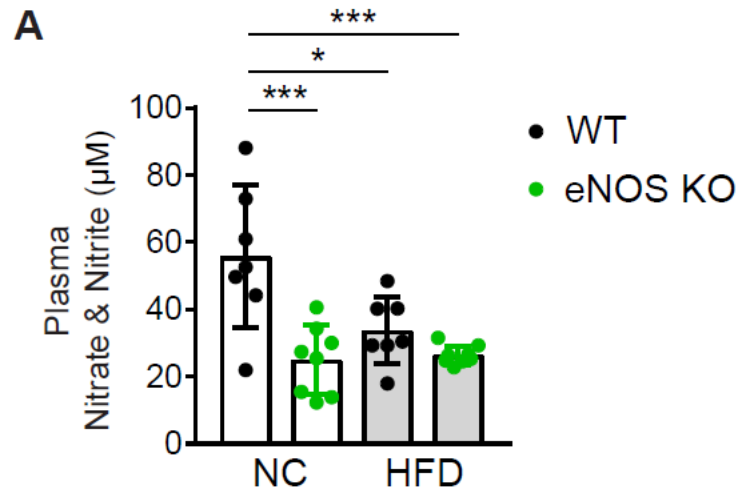

**Supplementary Figure9.** eNOS knockout (KO) animals do not exhibit changes in their plasma NO levels in response to high fat diet (HFD). **A.** Nitrate and nitrite levels measured in plasma from WT and eNOS KO mice receiving either normal chow (NC) or 6 weeks of HFD. \*\*\*  $p < 0.001$ , \*  $p < 0.05$  by 1-way ANOVA. N = 7-8 mice/group.

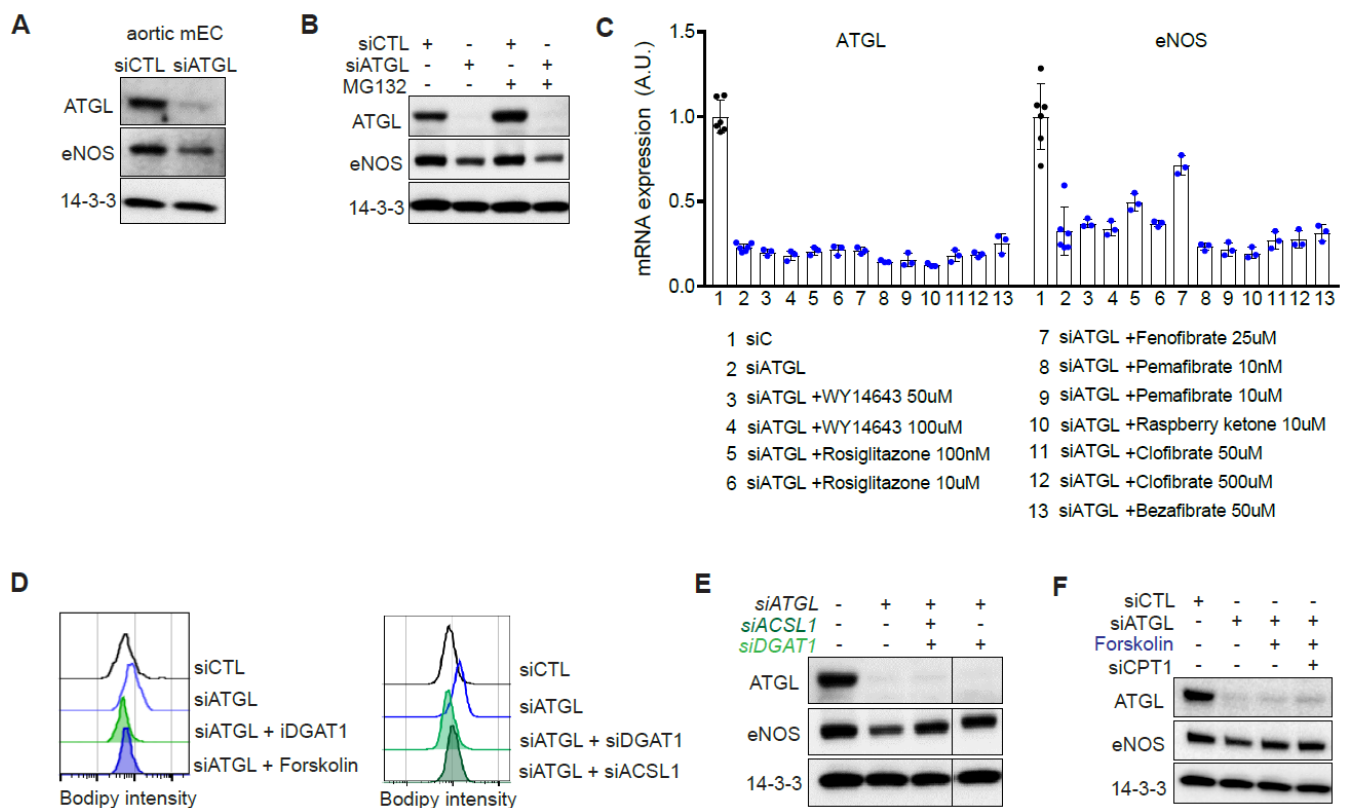

**Supplementary Figure10. ATGL knockdown suppresses eNOS and normalization of LD contents restores eNOS.** **A.** WB of ATGL and eNOS in primary cultured aortic mouse ECs treated with siATGL vs siCTL for 2 days. **B.** WB of ATGL and eNOS in HUVECs treated with siATGL vs siCTL for 2 days and with MG132 during the last 6 hour, as indicated. **C.** qPCR analysis of ATGL and eNOS in HUVECs treated with siATGL and with the indicated PPAR agonists at the indicated concentrations for 2 days. **D.** Flow cytometry analysis of bodipy intensity in HUVECs 2 days after indicated siRNA or drug treatment. **E.** WB of ATGL and eNOS in HUVECs treated with combinations of siACSL1, siDGAT1, or siATGL for 2 days, as indicated. **F.** WB of ATGL and eNOS in HUVECs treated with combinations of siCPT1, siATGL, or forskolin, as indicated.

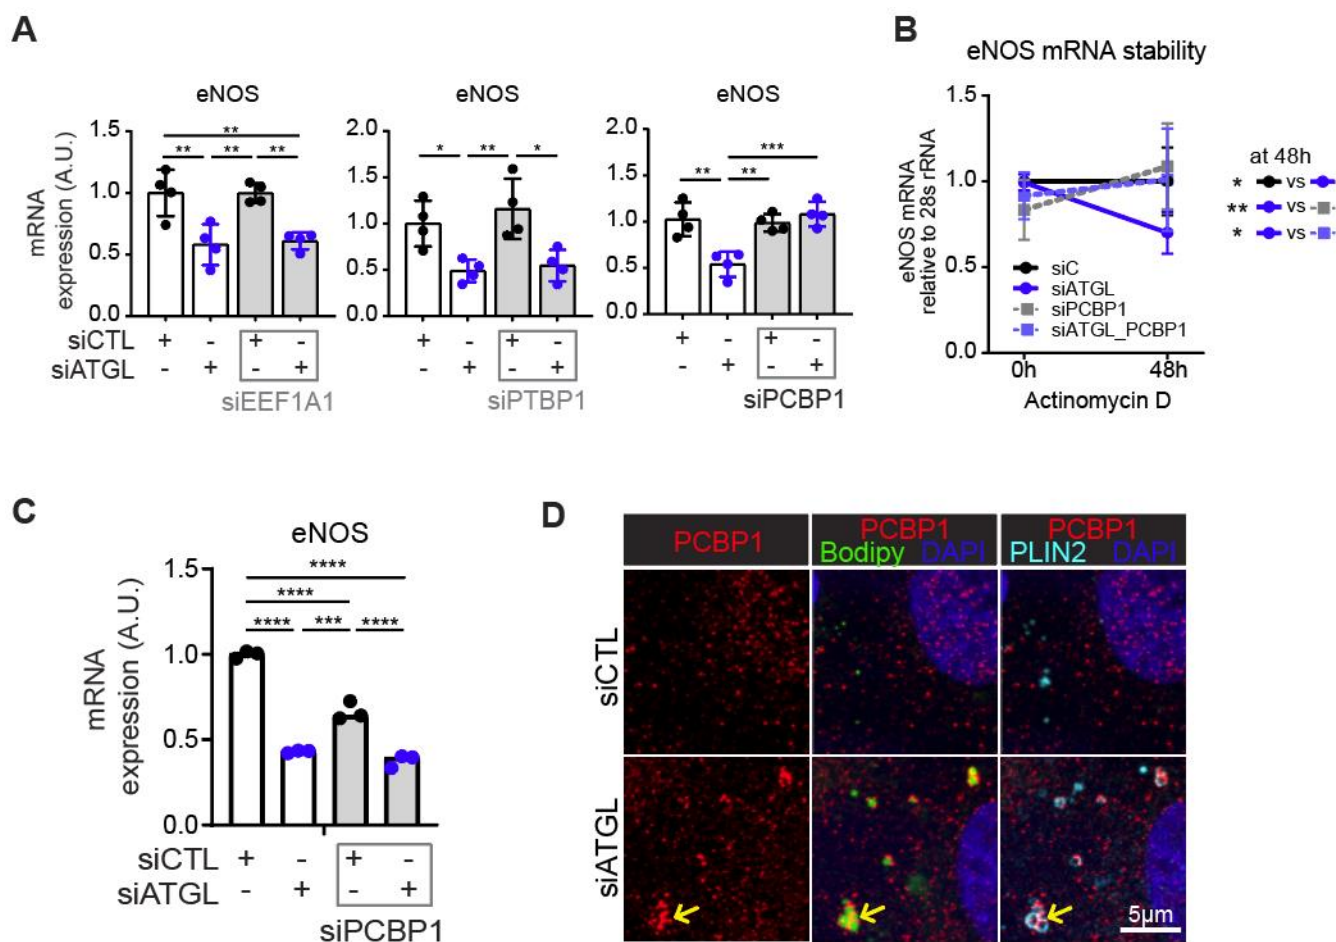

**Supplementary Figure11. PCBP1 as a potential regulator of eNOS mRNA stability.** **A.** Quantification of eNOS mRNA by qPCR in HUVECs treated with the indicated siRNAs for 48 hours. HUVECs were co-transfected for 48 hours with si-EEF1A1, -PTBP1, or -PCBP1 and either siCTL or siATGL. \*\*\*  $p < 0.001$ , \*\*  $p < 0.01$ , \*  $p < 0.05$  by 1-way ANOVA. **B.** eNOS mRNA stability measurements in HUVECs with indicated siRNA knockdown in response to Actinomycin D treatment (5nM). eNOS mRNA levels at indicated time points following Actinomycin D were normalized to 28S rRNA. \*\*  $p < 0.01$ , \*  $p < 0.05$  by 2-way ANOVA. **C.** Quantification of eNOS mRNA by qPCR in HUVECs treated with the indicated siRNAs for 96 hours. HUVECs were co-transfected with si-PCBP1 and either siCTL or siATGL. \*\*\*\*  $p < 0.0001$ , \*\*\*  $p < 0.001$  by 1-way ANOVA. **D.** Immuno-staining of HUVECs treated with control or Atgl siRNA for 2 days. PCBP1 (red), PLIN2 (cyan), Bodipy (green) and DAPI (blue).

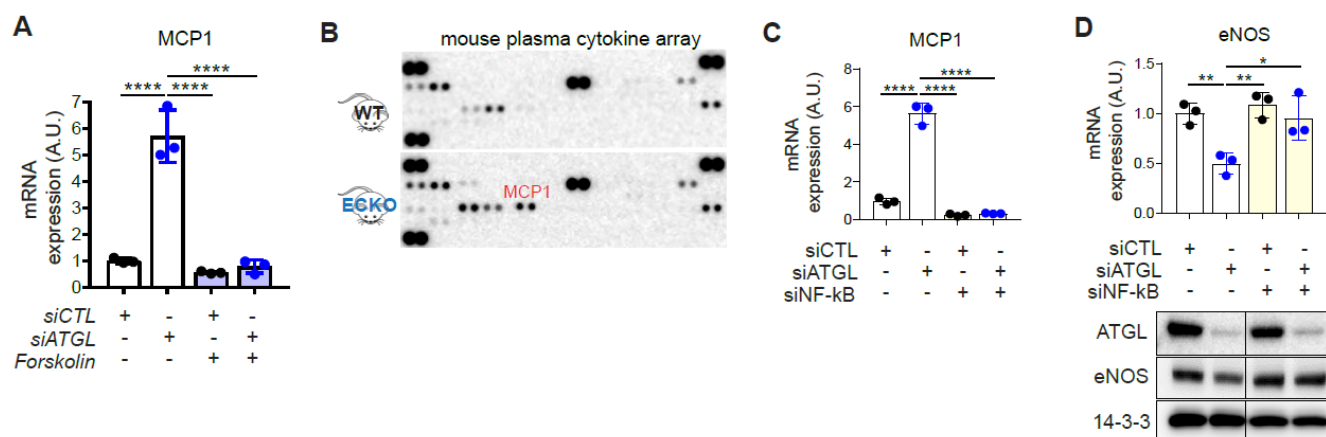

**Supplementary Figure 12. Suppression of ATGL induces MCP1 in a NF-kB-dependent manner. A.**

Quantification of MCP1 mRNA by qPCR following siATGL vs siCTL for two days with and without Forskolin treatment. **B.** Cytokine array assay with plasma collected from WT vs *Atgl* ECKO mice. **C.** Quantification of MCP1 mRNA by qPCR following siATGL vs siCTL for two days with or without siNF-kB. **D.** Quantification of eNOS by qPCR (upper panel) and WB (lower panel) following siATGL vs siCTL for two days with or without siNF-kB. \*\*\*\*  $p < 0.0001$ , \*\*  $< 0.01$ , \*  $< 0.05$  by 1-way ANOVA.

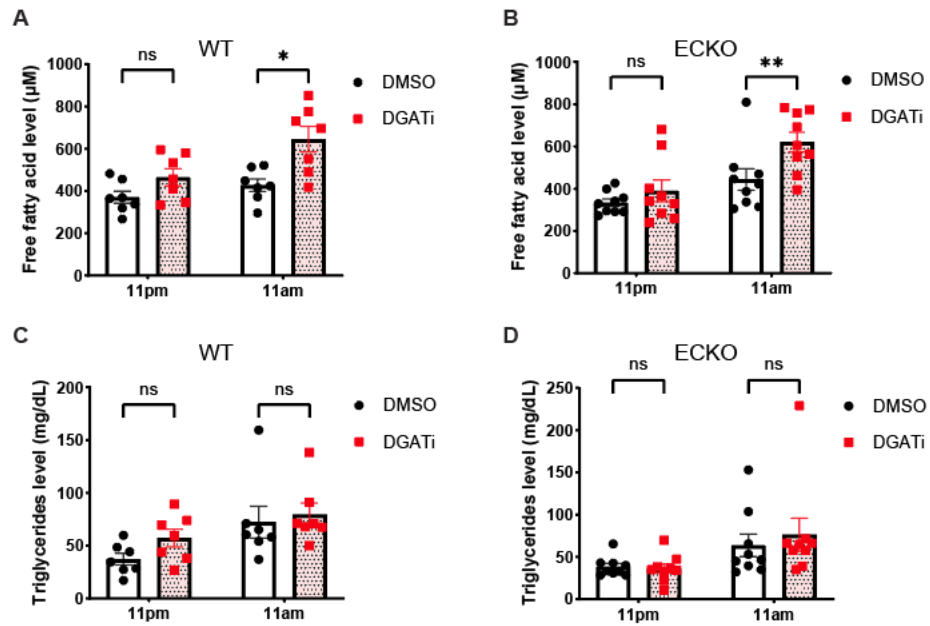

**Supplementary Figure13. Dgat1 inhibitor does not suppress post-prandial lipemia. A-B.** Quantification of plasma free fatty acids in WT (A) and *Atgl* ECKO (B) mice at the indicated time point after 3-days of DMSO vs iDgat1 injection. iDgat1 was given at 3mg/kg via IP injection. B-C. Quantification of plasma triglycerides in WT (C) and *Atgl* ECKO (D) mice at the indicated time point after 3-days of DMSO vs iDgat1 injection. iDgat1 was given at 3mg/kg via IP injection. \*\* < 0.01, \* < 0.05 by 1-way ANOVA.
